# Supplementary material
Source: publisher figshare collection journal article supplement (https://acs.figshare.com/ndownloader/files/10671478)
Supplement: Supplementary file 1 [file 10671478]

## Supporting Information

### Hemoglobin as a smart pH-sensitive nanocarrier to achieve aggregation enhanced tumor retention

Huan Li, Yangjun Chen, Zuhong Li, Xu Li, Qiao Jin and Jian Ji\*

\* To whom correspondence should be addressed: jijian@zju.edu.cn

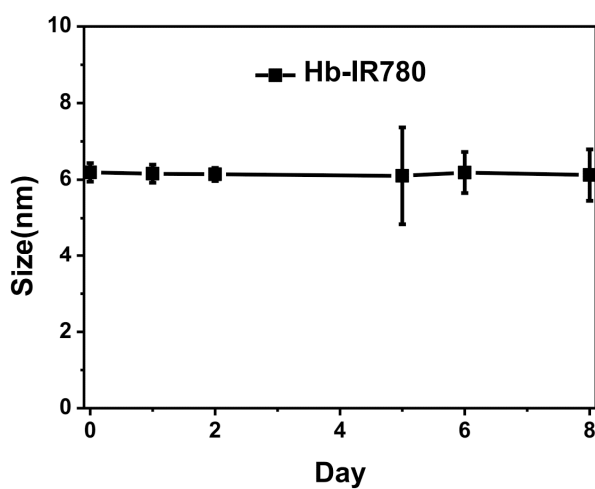

**Figure S1.** Hydrodynamic size of the Hb-IR780 complex in PBS over 8 days.

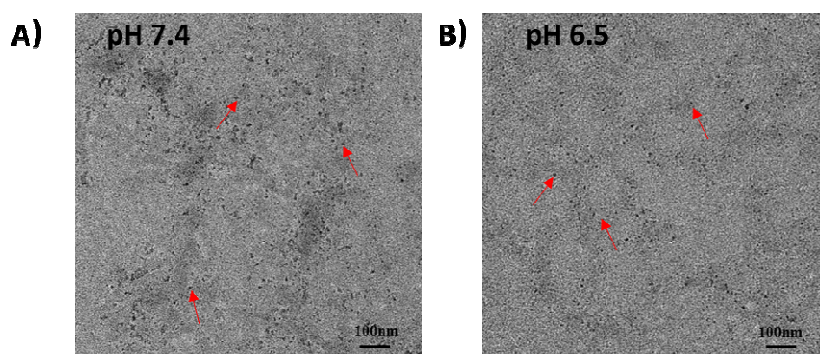

**Figure S2.** TEM images of the BSA-IR780 complex at pH 7.4 and pH 6.5 (The complex is highlighted by red arrow).

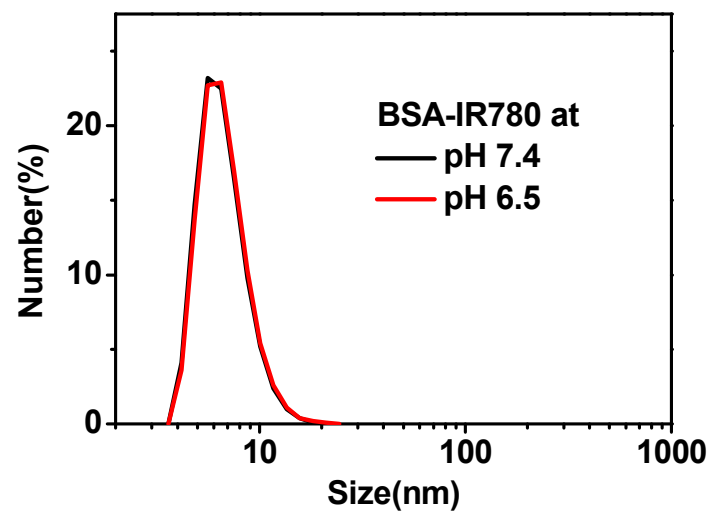

**Figure S3.** DLS results of the BSA-IR780 complex at pH 7.4 and pH 6.5.

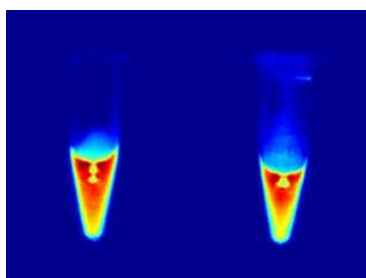

**Figure S4.** NIR imaging of the Hb-IR780 complex at pH 7.4 and pH 6.5.

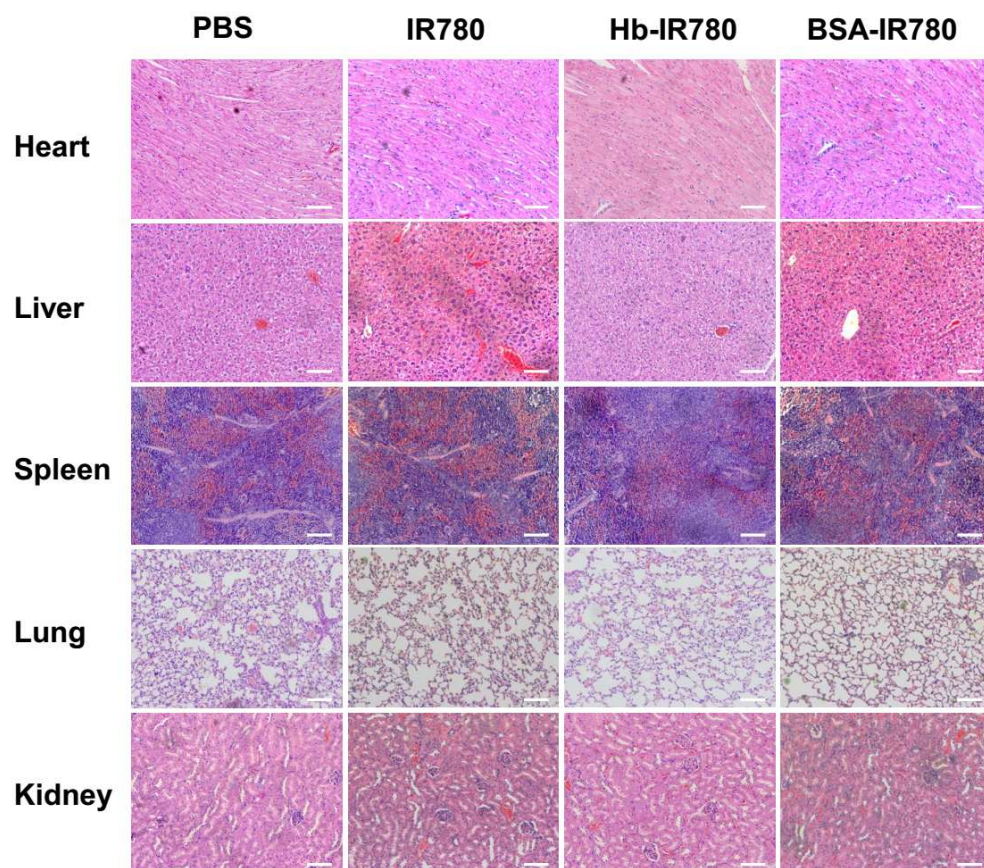

**Figure S5.** Hematoxylin and eosin (H&E) staining of primary organs of KB tumor bearing mice that treated with PBS, free IR780, the Hb-IR780 complex and the BSA-IR780 complex. Scale bars: 100 $\mu$ m.
